# Supplementary material
Source: publisher figshare collection journal article supplement (https://acs.figshare.com/ndownloader/files/3969844)
Supplement: Supplementary file 1 [file 3969844]

# Supporting Information

*for*

## “Molecular Hydrogen Formation from Photocatalysis of Methanol on Anatase-TiO<sub>2</sub>(101)”

Chenbiao Xu<sup>1,2,a)</sup>, Wenshao Yang<sup>1,a)</sup>, Qing Guo<sup>1,\*</sup>, Dongxu Dai<sup>1</sup>, Maodu Chen<sup>2</sup>,  
Xueming Yang<sup>1,\*</sup>

<sup>1</sup> *State Key Laboratory of Molecular Reaction Dynamics, Dalian Institute of Chemical Physics, 457 Zhongshan Road, Dalian 116023, Liaoning, P. R. China*

<sup>2</sup> *School of Physics and Optoelectronic Engineering, Dalian University of Technology, 2 Linggong Road, Dalian 116024, China*

*a) Authors who made similar contributions to this work.*

**TPD spectra for CH<sub>3</sub>OH** TPD signals of CH<sub>3</sub>OH on the A-TiO<sub>2</sub>(101) surface as a function of coverage was observed at mass-to-charge ratios ( $m/z$ ) of 31(CH<sub>2</sub>OH<sup>+</sup>) depicted in Figure S1. The desorption features are similar to previous results.<sup>1</sup> Five desorption features peaked at 142 K, 188 K, 270 K, 410 K, and 650 K are observed with better resolution and higher desorption temperature than previous study. In spite of better resolution, compared to the case of CH<sub>3</sub>OH on R-TiO<sub>2</sub>(110),<sup>2</sup> the first layer peak and the second layer peak are overlapped with each other seriously, implying that the adsorption sites and structures of A-TiO<sub>2</sub>(101) are more complicated than the case of R-TiO<sub>2</sub>(110).

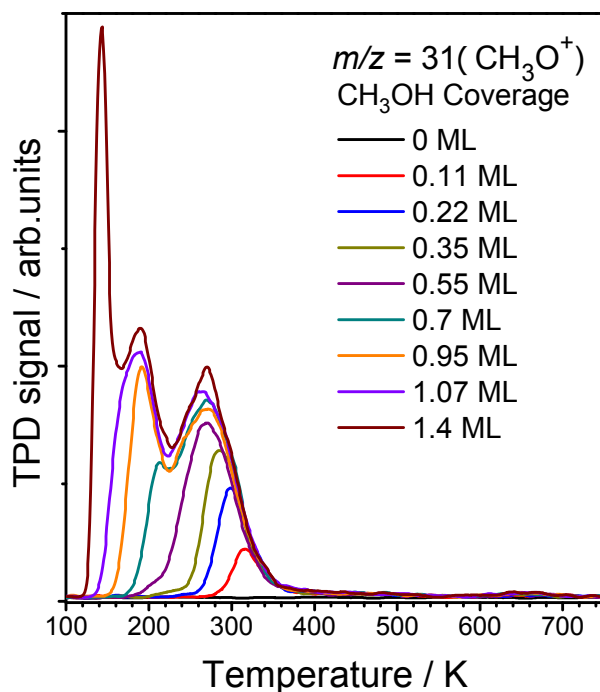

**Figure S1.** CH<sub>3</sub>OH TPD spectra ( $m/z = 31$ ) spectra from various exposures of CH<sub>3</sub>OH on the A-TiO<sub>2</sub>(101) surface at 100 K.

**TPD spectra for  $m/z = 30, 31, 32$**  TPD signals of mass 30, 31 and 32 resulting from 0.38 ML CH<sub>3</sub>OH on the A-TiO<sub>2</sub>(101) surface have been collected. The area ratio of  $m/z = 31$  and 32 at 270 K and 650 K peak in Figure S2, is the same, equal to 1.55, consistent with the cracking pattern of CH<sub>3</sub>OH detected in our quadrupole mass spectroscopy. And this implies that the  $m/z = 31$  and 32 650 K peak is from CH<sub>3</sub>OH. Thus, this is likely due to CH<sub>3</sub>O disproportionation at the five-coordinated Ti<sup>4+</sup>(Ti<sub>5c</sub>) sites, as on the R-TiO<sub>2</sub>(110) surface,<sup>3</sup>

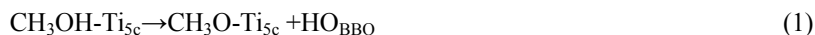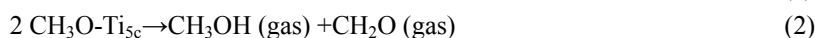

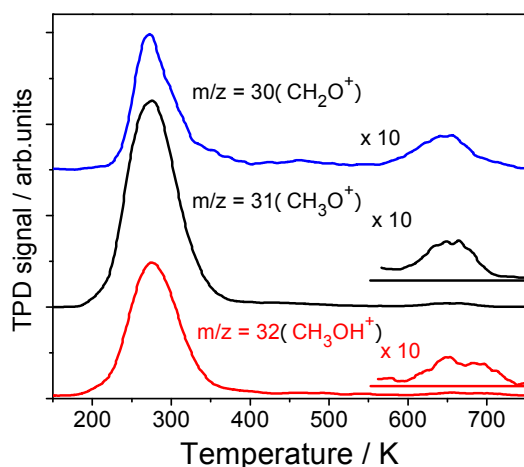

**Figure S2.** TPD spectra from a vacuum-annealed anatase (101) sample for a CH<sub>3</sub>OH coverage of 0.38 ML ( $m/z = 30, 31$ , and  $32$ ).

**TOF signals for  $m/z = 15, 18, 30, 32$**  Photo desorbed signals of CH<sub>3</sub> ( $m/z = 15$ ), H<sub>2</sub>O ( $m/z = 18$ ), CH<sub>2</sub>O ( $m/z = 30$ ), CH<sub>3</sub>OH ( $m/z = 32$ ) and HCOOCH<sub>3</sub> ( $m/z = 60$ ) were monitored during 10 min laser irradiation (by time-of-flight methods, as shown in Figure. S3), a big desorption signal of formaldehyde (CH<sub>2</sub>O) was detected, as well as methyl radical (CH<sub>3</sub>) and methanol (CH<sub>3</sub>OH). However, CH<sub>2</sub>O and CH<sub>3</sub> signals are much bigger than CH<sub>3</sub>OH signal. Considering ionizer fragmentation patterns of CH<sub>3</sub>OH, the CH<sub>3</sub> signal has two components: the parent ion signal of methyl radical (CH<sub>3</sub>), and the ion-fragment signal of the parent CH<sub>3</sub>OH molecule, as well as the CH<sub>2</sub>O signal. No H<sub>2</sub>O desorption signal was detected. As shown in the picture, the ratio of density flux of CH<sub>2</sub>O and CH<sub>3</sub>OH is 4:1, the electron-impact ionization cross section of CH<sub>2</sub>O and CH<sub>3</sub>OH at 70 eV is nearly the same. The desorption yield of CH<sub>2</sub>O is 4 times of that of CH<sub>3</sub>OH.

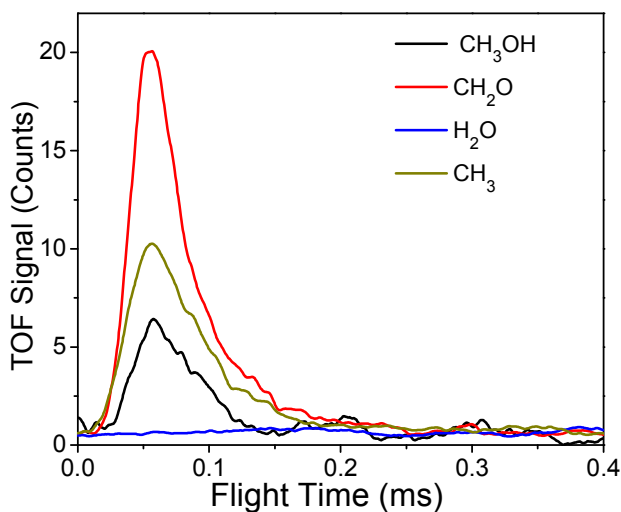

**Figure S3.** Time of flight signals of  $m/z = 15$  (CH<sub>3</sub><sup>+</sup>),  $18$ (H<sub>2</sub>O<sup>+</sup>),  $30$ (CH<sub>2</sub>O<sup>+</sup>), and  $32$ (CH<sub>3</sub>OH<sup>+</sup>) during 10 min 266 nm irradiation with a photon flux of  $1.9 \times 10^{17}$  photons cm<sup>-2</sup> s<sup>-1</sup>.

**Mass fragmentation pattern of CH<sub>3</sub>OH** Mass fragmentation pattern of CH<sub>3</sub>OH was collected by our quadrupole mass detector; the cracking signal of CH<sub>3</sub>OH to  $m/z = 30$  is only 1/5 of the parent mass ion.

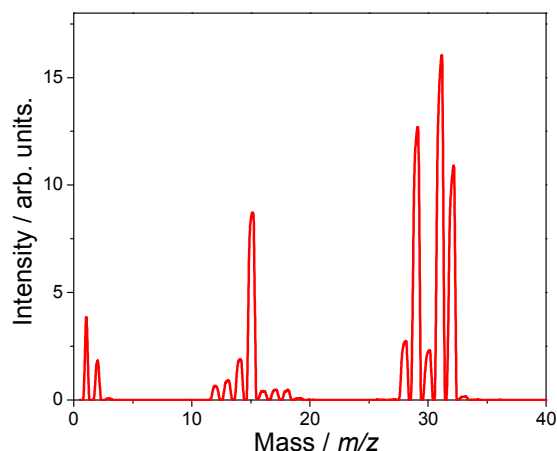

**Figure S4.** Mass fragmentation pattern of CH<sub>3</sub>OH in the TOF mass detector in our surface photocatalysis apparatus.

**TPD spectra for  $m/z = 15$**  TPD signals of  $m/z = 15$  resulting from 0.38 ML CH<sub>3</sub>OH on the A-TiO<sub>2</sub>(101) surface as a function as irradiation time were collected. The 550 K peak has two components: one component is CH<sub>3</sub> radical desorption, and this part is about 0.03 ML, other one is the fragment of CH<sub>3</sub>OH at 650 K. After irradiation, the 550 K shifted toward lower temperature and the peak width is narrowed, as the peak intensity is also increased after UV irradiation. The high temperature side of the 550 K CH<sub>3</sub> peak decreases rapidly in the first 1 min., which is due to the fast depletion of CH<sub>3</sub>O-Ti<sub>5c</sub> at 650 K.

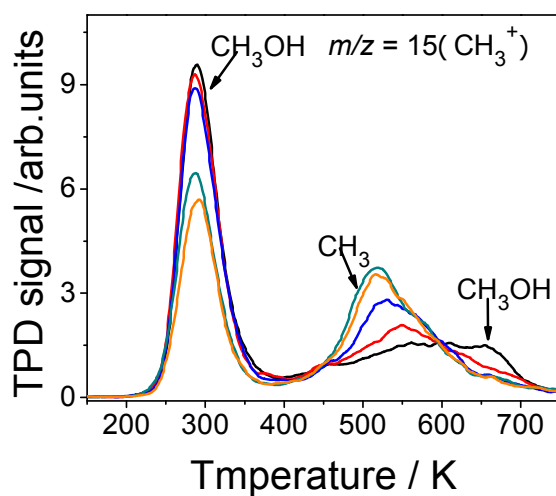

**Figure S5.** TPD spectra collected at  $m/z = 15$ , from the photocatalysis of CH<sub>3</sub>OH/A-TiO<sub>2</sub>(101) with a photon flux of  $1.9 \times 10^{17}$  photons cm<sup>-2</sup> s<sup>-1</sup>.

**Product yields for D<sub>2</sub>O versus D<sub>2</sub> on rutile-TiO<sub>2</sub>(110)** Product yields of D<sub>2</sub>O and D<sub>2</sub> on a 0.5 ML CD<sub>3</sub>OD covered R-TiO<sub>2</sub>(110) surface as a function of irradiation time were measure, as depicted in Figure S5. The rate of D<sub>2</sub>O product formation as a function of laser irradiation time is quite different from that of D<sub>2</sub> product. The D<sub>2</sub>O yield increases very fast first and then reaches a plateau. Since one oxygen defect is created for one D<sub>2</sub>O molecule formed during TPD, it appears that BBO defects make D<sub>2</sub>O formation more difficult. The D<sub>2</sub> yield, however, increases faster than that of D<sub>2</sub>O as the number of BBO defects increases. Hence, more BBO defects created by D<sub>2</sub>O recombinative desorption on the surface can make formation of D<sub>2</sub> easier than D<sub>2</sub>O formation.

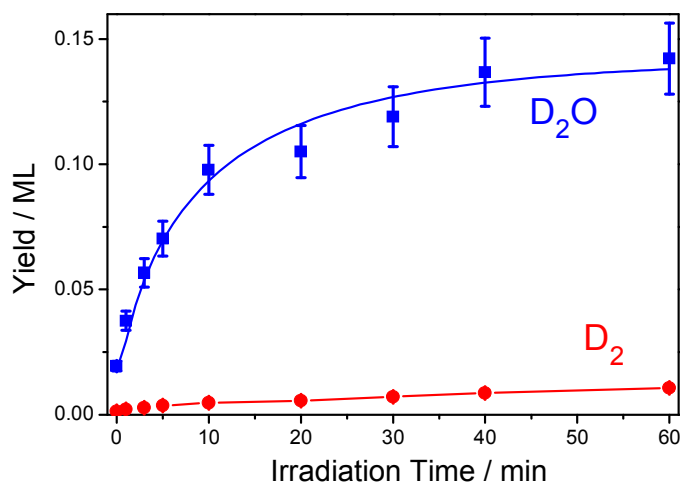

**Figure S6.** Yields of the molecular hydrogen (D<sub>2</sub>), water (D<sub>2</sub>O) TPD product as a function of laser irradiation time on 0.5 ML of CD<sub>3</sub>OD covered R-TiO<sub>2</sub>(110) surface.

S1 Herman, G. S.; Dohnálek, Z.; Ruzycki, N.; Diebold, U. *J. Phys. Chem. B* **2003**, *107*, 2788-2795.

S2 Henderson, M. A.; Otero-Tapia, S.; Castro, M. E. *Faraday Discuss.* **1999**, *114*, 313-319.

S3 Shen, M.; Henderson, M. A. *J. Phys. Chem. Lett.* **2011**, *2*, 2707-2710.
